# Supplementary material for: dsRNA expression in the mouse elicits RNAi in oocytes and low adenosine deamination in somatic cells
Source: PubMed Central journal article supplement — Nucleic Acids Res. 2011 Sep 8;40(1):399–413. doi: 10.1093/nar/gkr702 (PMC3245926; doi:10.1093/nar/gkr702), 2011-09-08
Supplement: supp_gkr702_nar-01868-v-2011-File010.pdf [file supp_gkr702_nar-01868-v-2011-File010.pdf]

## SUPPLEMENTAL MATERIAL

dsRNA expression in the mouse elicits RNAi in oocytes and low adenosine deamination in  
somatic cells

Running title: dsRNA in mammals

Jana Nejepinska<sup>1</sup>, Radek Malik<sup>1</sup>, Jody Filkowski<sup>2,3</sup>, Matyas Flemr<sup>1</sup>, Witold Filipowicz<sup>2</sup>, and  
Petr Svoboda<sup>1+</sup>

Keywords: dsRNA, RNA hairpin, RNAi, interferon, IFN, adenosine deamination, ADAR.

<sup>1</sup>Institute of Molecular Genetics, Videnska 1083, 14220 Praha 4, Czech Republic

<sup>2</sup>Friedrich Miescher Institute for Biomedical Research, Maulbeerstrasse 66, 4058 Basel,  
Switzerland

<sup>2</sup> current address: Department of Biological Sciences, University of Lethbridge, 4401  
University Drive, Lethbridge, Alberta, T1K 3M4, Canada

<sup>+</sup>corresponding author:

Petr Svoboda (svobodap@img.cas.cz)

## SUPPLEMENTARY FIGURES

### Figure S1 Expression constructs

(A) A schematic overview of *Mos* transcribed sequences used for vector cloning, dsRNA expression and experimental analysis. *Mos* gene is intronless. The blue arrow depicts the coding sequence. The length of the dsRNA region is about 0.5 kb. Drawn approximately to the scale. (B) A schematic organization of MosIR, MosP, Mos3 transgenes. *Mos* sequence present in MosP and Mos3 vectors correspond to the sequence fragment shown in the panel A. The last two schemes depict expression cassettes of RL-Mos3 and FF reporter plasmids used in cell culture experiments. (C) EGFP fluorescence in MosP, Mos3 and MosIR transgenic lines used in the project. The fresh tail biopsies were photographed together.

### Figure S2 Analysis of MosIR expression

(A) Relative MosIR levels in transgenic organs. The graph shows the MosIR expression displayed as  $\log_2$  relative to *Hprt*, a routinely used internal standard in qPCR. MosIR expression was monitored with CagI primers (Table SIII). (B) Comparison of expression of MosIR and pCAGEGFP (parental plasmid into which was inserted the *Mos* inverted repeat) transcripts in cultured cells suggests similar mRNA expression from both plasmids. 293 cells grown in a 24-well plate were transfected with indicated amounts of MosIR and pCAGEGFP and the level of CAG-driven mRNA was determined 48 hours after transfection by qPCR using CagI qPCR primers. (C) MosIR produces significantly reduced levels of EGFP. 293 cells grown in a 24-well plate were transfected with indicated amounts of MosIR and pCAGEGFP and the amount of EGFP was determined 48 hours after transfection by flow cytometry. The X-axis shows green fluorescence intensity (FL1-H), the Y axis indicates the frequency of cells with a given intensity ( $5 \times 10^4$  cells were counted).

### Figure S3 SOLiD analysis of transgenic organs and transfected 293 cells.

(A) Column graphs show absolute numbers of reads in three SOLiD small RNA libraries and counts of reads of different sequence lengths. Pie graphs show representation of several different classes of small RNAs in analyzed samples. (B) Distribution of 21-23 nt long reads along the MosIR transgene. Graph depicts cumulative counts of 5' ends of 21-23 nt long small RNAs. Sense and antisense RNAs are shown above and below the line, respectively. Note small RNAs generated from the plasmid backbone and antisense small RNAs from intronic and EGFP coding sequences, which indicate that the transfected MosIR plasmid is transcribed in a rather complex manner. (C) Length distribution of small RNAs from EGFP

and Mos inverted repeat (MosIR) regions of the MosIR transgene in the transgenic brain and in 293 cells transiently transfected with the MosIR transgene.

**Figure S4** Methylation status of different *Mos* sequences in different genetic backgrounds

*Mos* DNA bisulfite sequencing was performed as described previously (1). Each row of circles represents one clone from bisulfite sequencing. White circles represent unmethylated cytosines, black circles represent methylated cytosines. Shaded area denotes a region of the *Mos* sequence that is complementary to the MosIR hairpin. Unframed data are derived from the endogenous *Mos* gene sequence while clones in red frames are derived from transgenic *Mos* sequences, which carry a mutation of one KpnI site (highlighted in the Supplementary Figure S1) allowing for distinguishing between endogenous and transgenic clones. The upper two datasets show methylation of endogenous *Mos* gene sequences in tail DNA from two independent MosIR transgenic lines. Tail EGFP fluorescence shows that the MosIR transgene is active in these tissues. In contrast to the endogenous *Mos* sequence, the *Mos* sequence inserted in the Mos3 transgene is hypermethylated in the genome. DNA methylation is not unusual for exonic sequences. *Mos* sequence in an active MosP transgene is hypomethylated. The last panel shows analysis of tail DNA from an animal showing signs of spontaneous silencing of the MosP transgene, which identified a hypermethylated clone derived from the MosP sequence.

**Figure S5** Adenosine deamination in nuclear, cytoplasmic and polysomal fractions

(A) Analysis of adenosine deamination of MosIR RNA in nuclear and cytoplasmic fractions from MEFs derived from transgenic embryos. Adenosine deamination was analyzed by cloning RT-PCR products from the MosIR region indicated on the top. Lower panels show results of editing analysis of MosIR transcripts from nuclear and cytoplasmic fractions, which were prepared from MosIR MEFs as described previously (2). Each row of squares represents one sequenced clone. Each square represents an individual adenosine in the analyzed sequence. A part of the PCR product is derived from the stem (dsRNA) sequence (white squares) and a part from single stranded sequence (grey squares). A/G conversions are indicated by black squares. (B) Polysome profiling of MosIR-positive MEFs. Profiling was performed as described previously (3). Material sampling for qPCR is indicated by vertical lines. (C) qPCR analysis of relative abundance of *Hprt* and MosIR RNAs in the three fractions indicated in the panel A. Relative RNA content in the monosomal fraction was arbitrarily set to one. (D) Edited MosIR RNA is present in the polysomal fraction in transgenic MEFs. qPCR product obtained from the polysomal fraction was cloned and 23

individual clones were sequenced. Since the qPCR product localizes into the inverted repeat, two regions from both arms were apparently amplified (grey areas), which can be distinguished by a single nucleotide mutation in one of the arms. Sequenced clones were first sorted out according to their origin from sense or antisense arm and their editing (apparent as A/G conversion) was determined. The bottom panel shows five clones, in which we identified RNA editing (highlighted as black squares among white squares; each row of squares represents all adenosines in an individual sequenced clone). Origin of edited clones from the sense or antisense arms of the MosIR is indicated.

## SUPPLEMENTARY TABLES

**Table SI** -.Probe sets differentially expressed upon dsRNA expression in 293 and HeLa cells

**Table SII** - Differentially expressed probe sets (>2-fold) in 293 and HeLa cells transfected with the MosIR plasmid.

**Table SIII** - Sequences of primes used in this study

## REFERENCES

1. Svoboda, P., Stein, P., Filipowicz, W. and Schultz, R.M. (2004) Lack of homologous sequence-specific DNA methylation in response to stable dsRNA expression in mouse oocytes. *Nucleic Acids Res*, **32**, 3601-3606.
2. Djouder, N., Metzler, S.C., Schmidt, A., Wirbelauer, C., Gstaiger, M., Aebersold, R., Hess, D. and Krek, W. (2007) S6K1-mediated disassembly of mitochondrial URI/PP1gamma complexes activates a negative feedback program that counters S6K1 survival signaling. *Mol Cell*, **28**, 28-40.
3. Chiu, W.L., Wagner, S., Herrmannova, A., Burela, L., Zhang, F., Saini, A.K., Valasek, L. and Hinnebusch, A.G. (2010) The C-terminal region of eukaryotic translation initiation factor 3a (eIF3a) promotes mRNA recruitment, scanning, and, together with eIF3j and the eIF3b RNA recognition motif, selection of AUG start codons. *Mol Cell Biol*, **30**, 4415-4434.

Figure S1

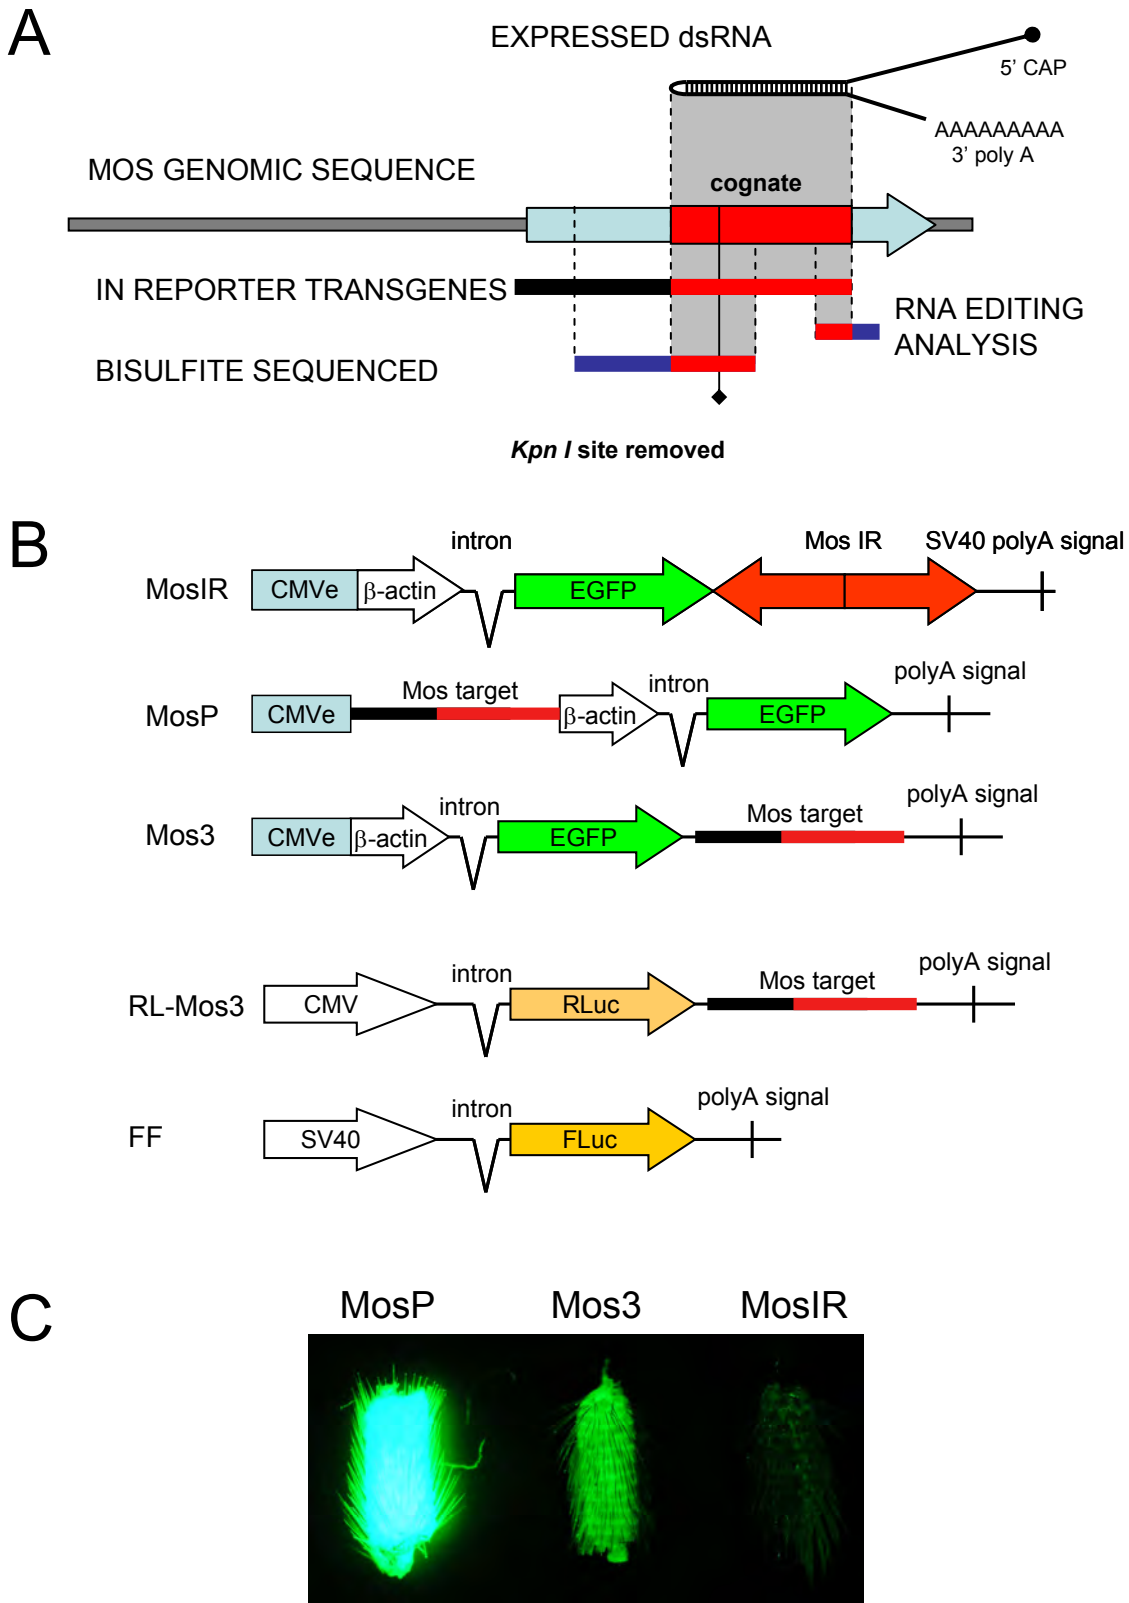

Figure S2

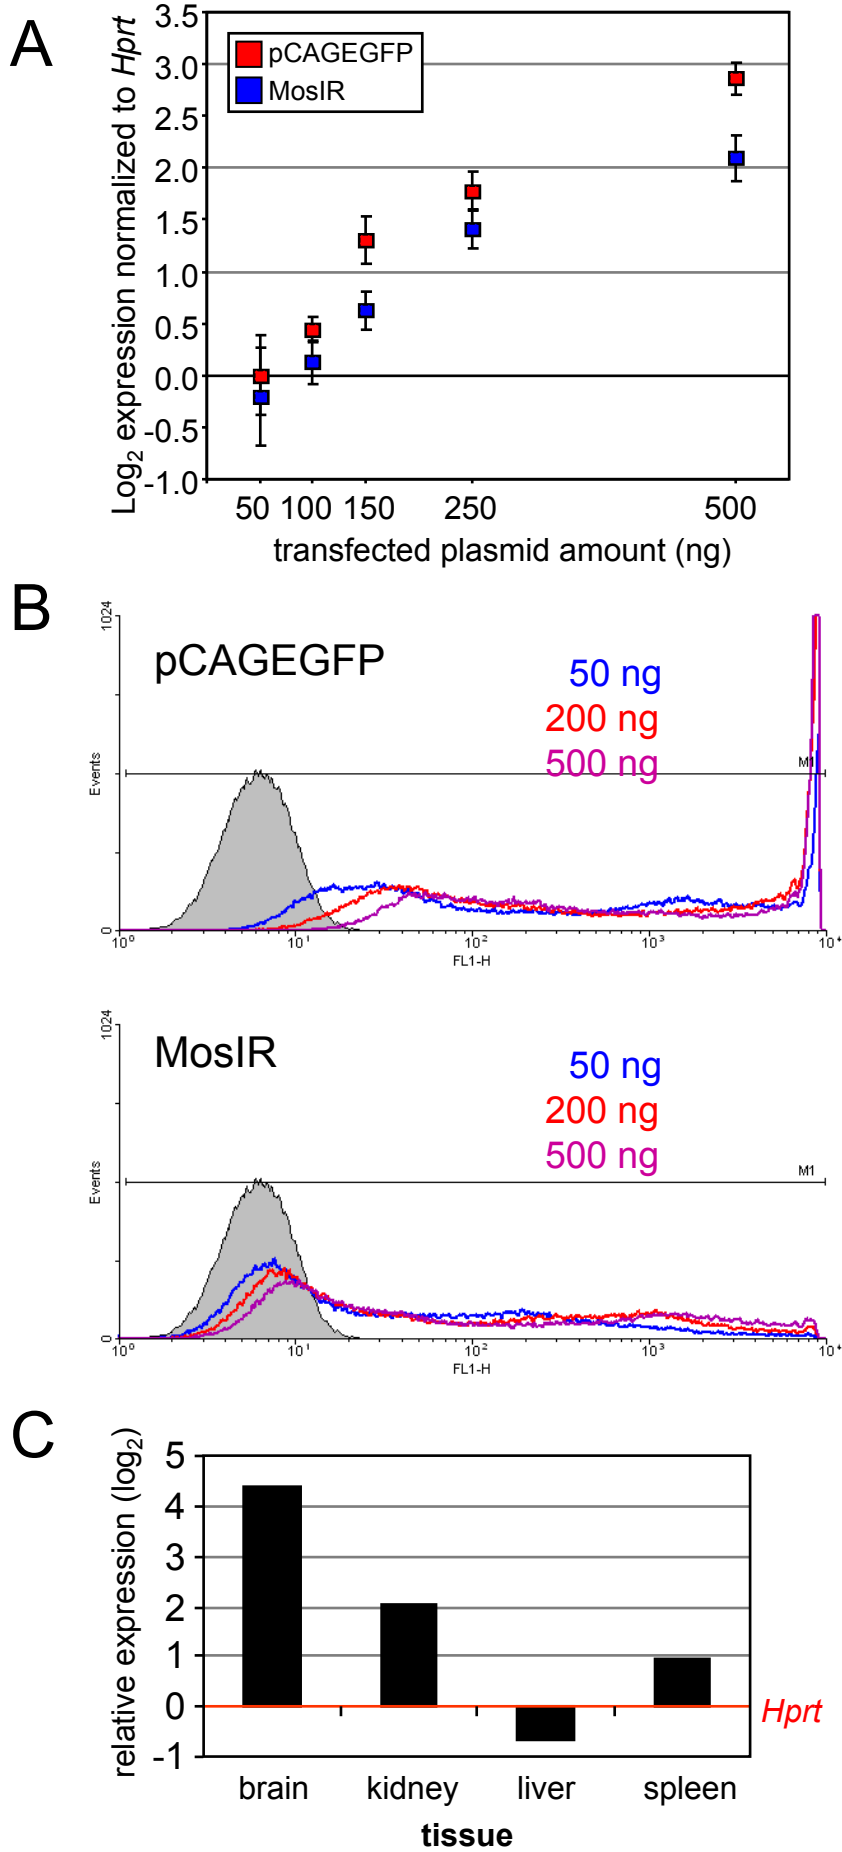

Figure S3

**A**

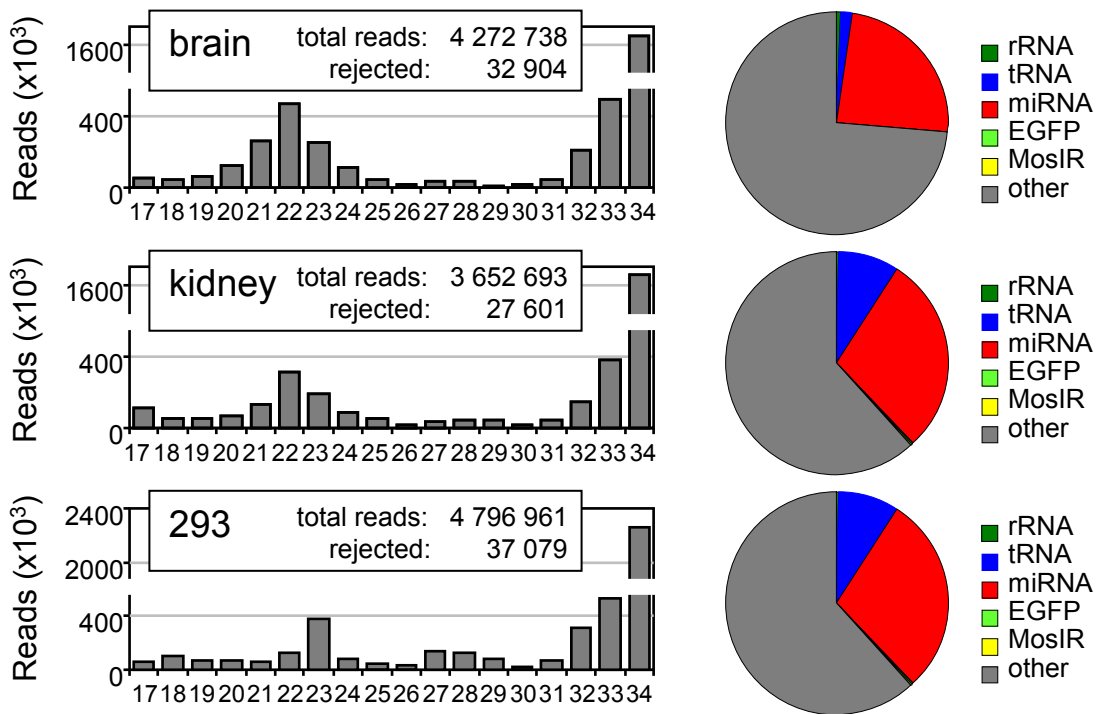

**B**

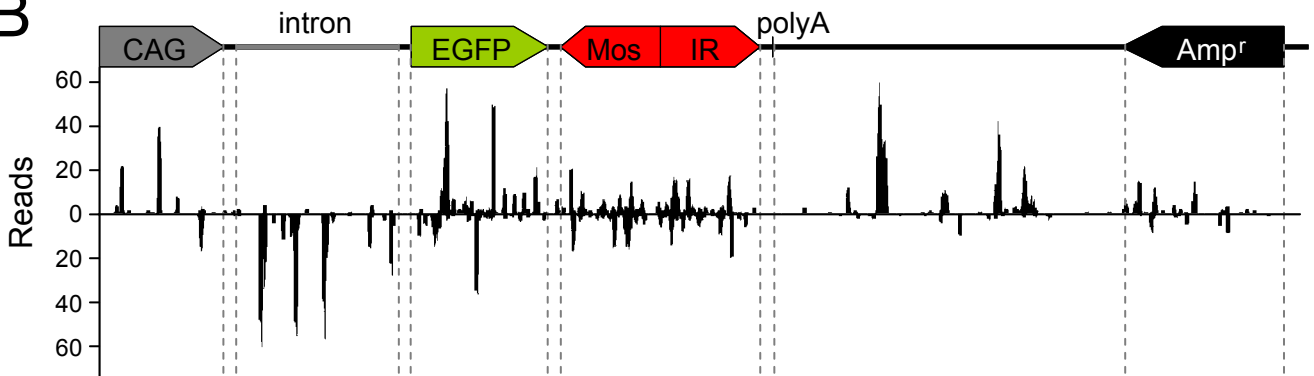

**C**

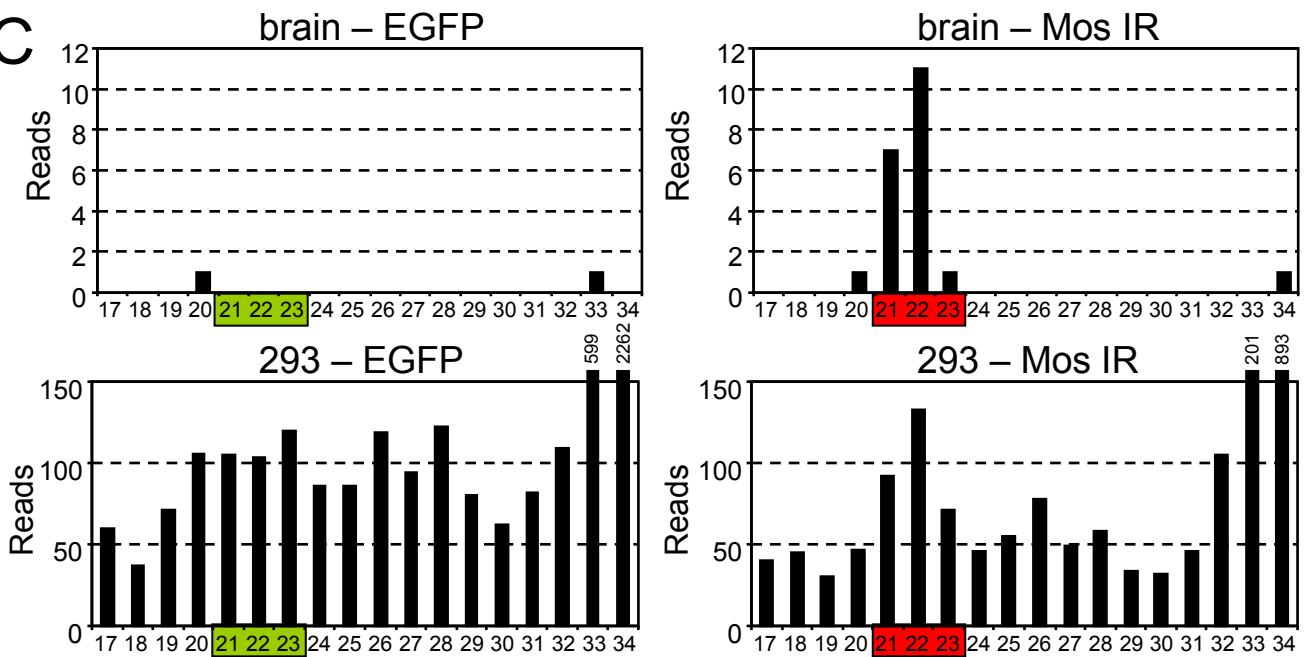

Figure S4

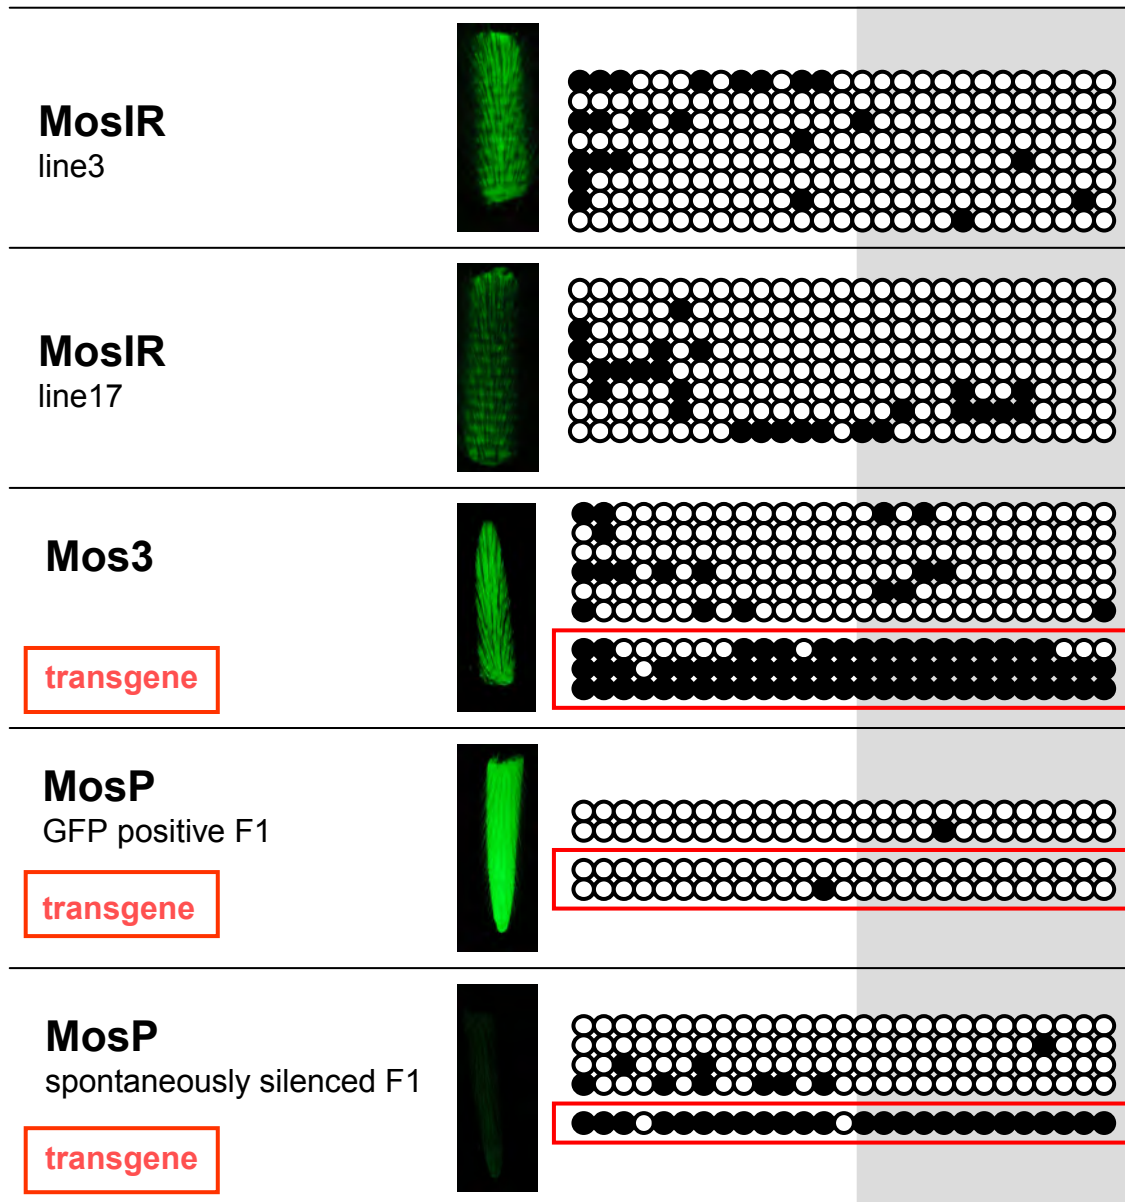



Figure S5

A

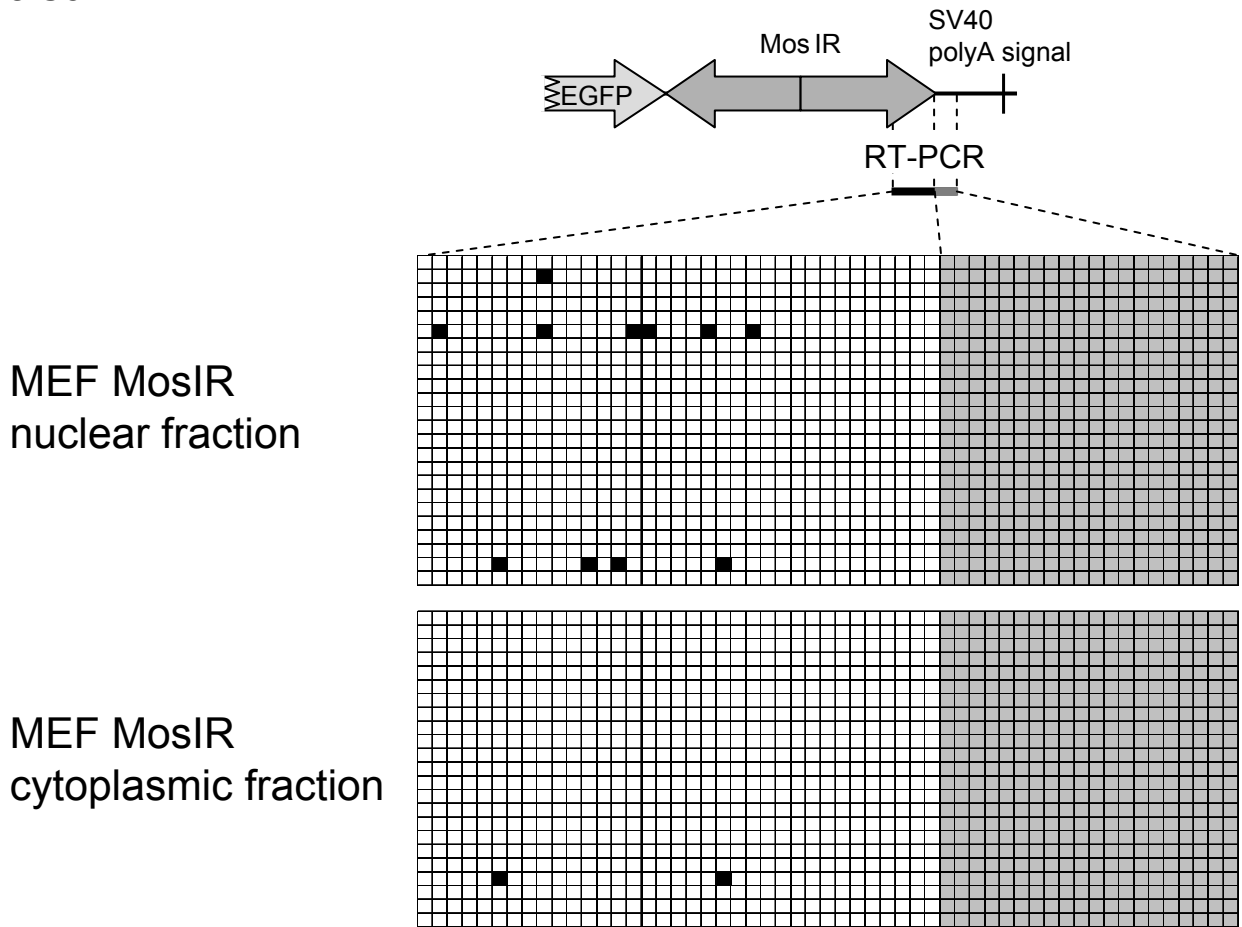

B

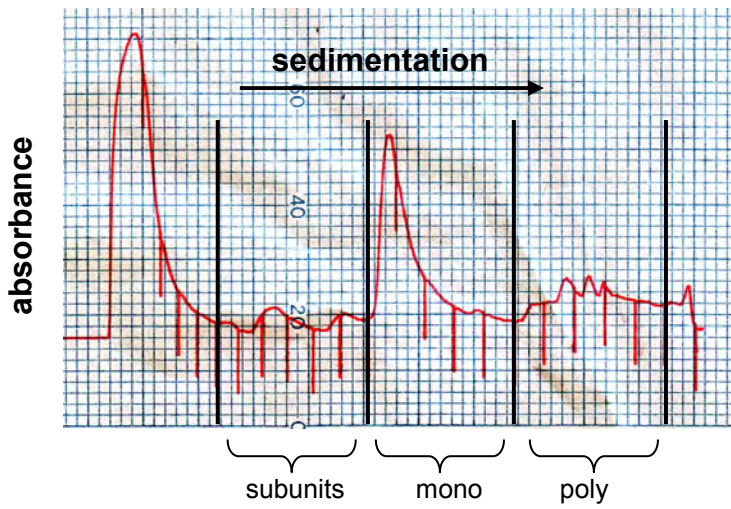

C

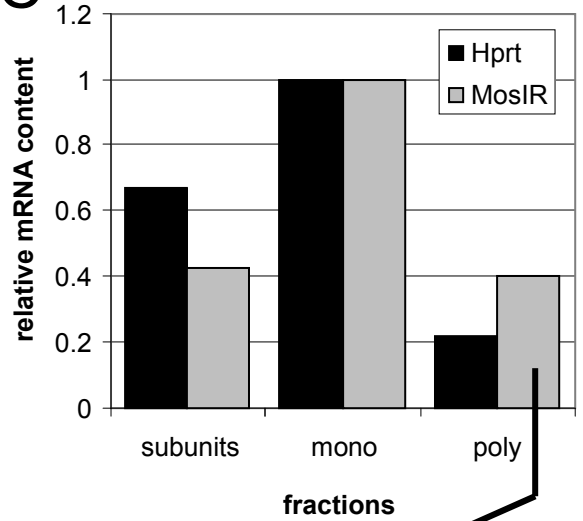

D

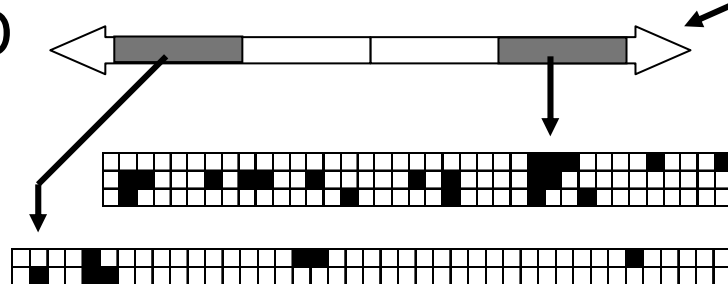

**Table S1**

| Gene          | Description                                                       | RefSeq     | fold change |      |
|---------------|-------------------------------------------------------------------|------------|-------------|------|
|               |                                                                   |            | HeLa        | 293  |
| C1orf79       | chromosome 1 open reading frame 79                                | XM_378848  | 5.51        | 4.61 |
| CIP29         | cytokine induced protein 29 kDa                                   | NM_033082  | 2.53        | 3.35 |
| DKFZp686L1418 | hypothetical gene supported by BX538329                           | XM_499121  | 10.47       | 3.86 |
| FAM24B        | family with sequence similarity 24, member B                      | NM_152644  | 2.96        | 2.72 |
| FAM80B        | family with sequence similarity 80, member B                      | NM_020734  | 3.44        | 2.74 |
| FLJ37953      | hypothetical protein FLJ37953                                     | NM_152382  | 2.28        | 2.21 |
| HIST1H4H      | histone 1, H4h                                                    | NM_003543  | 3.02        | 2.23 |
| HIST2H4       | histone 2, H4                                                     | NM_003548  | 2.06        | 5.73 |
| INHBE         | inhibin, beta E                                                   | NM_031479  | 2.83        | 3.32 |
| KHDRBS1       | KH domain containing, RNA binding, signal transduction associated | NM_006559  | 3.57        | 5.69 |
| LOC441241     | chaperonin containing TCP1, subunit 6A (zeta 1)-like              | XM_496886  | 2.33        | 3.33 |
| LOC441378     | Pvt1 oncogene homolog, MYC activator (mouse), LOC441378           | XM_372058  | 2.21        | 2.78 |
| P8            | p8 protein (candidate of metastasis 1)                            | NM_012385  | 2           | 2.61 |
| SFRS7         | splicing factor, arginine/serine-rich 7, 35kDa                    | NM_0010316 | 3.51        | 2.38 |
| ST7L          | suppression of tumorigenicity 7 like                              | NM_017744  | 2.02        | 2.37 |
| TARS          | Threonyl-tRNA synthetase                                          | NM_152295  | 10.24       | 2.85 |
| WDFY3         | WD repeat and FYVE domain containing 3                            | NM_014991  | 2.4         | 2.53 |

| Name         | Gene Symbol (Genedata An RefSeq Transcrip | UniGene [A]  | HeLa 500/0 | Hek 500/0 |      |
|--------------|-------------------------------------------|--------------|------------|-----------|------|
| 210118_s_at  | IL1A                                      | NM_000575    | Hs.1722    | 34.11     | 0.82 |
| 205476_at    | CCL20                                     | NM_004591    | Hs.75498   | 20.72     | 0.97 |
| 207850_at    | CXCL3                                     | NM_002090    | Hs.89690   | 11.91     | 1.11 |
| 204760_s_at  | NR1D1, THRA                               | NM_003250    | Hs.724     | 11.56     | 1.75 |
| 231412_at    | DKFZp686L14188                            | XM_499121    | Hs.150298  | 10.43     | 3.86 |
| 240206_at    | TARS                                      | NM_152295    | Hs.481860  | 10.22     | 2.94 |
| 211506_s_at  | IL8                                       | NM_000584    | Hs.624     | 9.43      | 1.07 |
| 205205_at    | RELB                                      | NM_006509    | Hs.307905  | 9.38      | 1.76 |
| 204470_at    | CXCL1                                     | NM_001511    | Hs.789     | 8.20      | 0.81 |
| 205599_at    | TRAF1                                     | NM_005658    | Hs.531251  | 8.16      | 0.95 |
| 244070_at    | SYNE1                                     | NM_015293    | Hs.12967   | 7.93      | 1.06 |
| 206157_at    | PTX3                                      | NM_002852    | Hs.567326  | 7.74      | 1.18 |
| 209305_s_at  | GADD45B                                   | NM_015675    | Hs.110571  | 7.63      | 0.81 |
| 31637_s_at   | NR1D1, THRA                               | NM_003250    | Hs.724     | 7.46      | 1.55 |
| 1569020_at   | NEDD9                                     | NM_006403    | Hs.37982   | 7.27      | 0.91 |
| 239669_at    | HIST1H3D                                  | NM_003530    | Hs.532144  | 7.09      | 1.56 |
| 1554980_a_at | ATF3                                      | NM_001030287 | Hs.460     | 7.04      | 1.23 |
| 227099_s_at  | LOC387763                                 | XM_373497    | Hs.530443  | 6.87      | 1.04 |
| 206814_at    | NGFB                                      | NM_002506    | Hs.2561    | 6.84      | 0.94 |
| 242329_at    | LOC401317                                 | XM_379479    | Hs.585228  | 6.77      | 1.70 |
| 218066_at    | SLC12A7                                   | NM_006598    | Hs.172613  | 6.68      | 0.96 |
| 209774_x_at  | CXCL2                                     | NM_002089    | Hs.75765   | 6.49      | 1.00 |
| 1562153_a_at | PVT1                                      | XM_372058    | Hs.584794  | 6.48      | 1.25 |
| 209304_x_at  | GADD45B                                   | NM_015675    | Hs.110571  | 6.36      | 1.10 |
| 223484_at    | NMES1                                     | NM_032413    | Hs.112242  | 6.23      | 0.99 |
| 229518_at    | FAM46B                                    | NM_052943    | Hs.59771   | 6.08      | 0.82 |
| 219270_at    | MGC4504                                   | NM_024111    | Hs.155569  | 5.97      | 2.07 |
| 205409_at    | FOSL2                                     | NM_005253    | Hs.568265  | 5.88      | 1.21 |
| 202859_x_at  | IL8                                       | NM_000584    | Hs.624     | 5.83      | 0.74 |
| 206085_s_at  | CTH                                       | NM_001902    | Hs.19904   | 5.76      | 1.87 |
| 202531_at    | IRF1                                      | NM_002198    | Hs.436061  | 5.68      | 1.26 |
| 205193_at    | MAFF                                      | NM_012323    | Hs.517617  | 5.67      | 1.03 |
| 224588_at    | XIST                                      | NR_001564    | Hs.529901  | 5.66      | 1.00 |
| 207574_s_at  | GADD45B                                   | NM_015675    | Hs.110571  | 5.66      | 1.06 |
| 223774_at    | C1orf79                                   | XM_378848    | Hs.528699  | 5.48      | 4.61 |
| 202672_s_at  | ATF3                                      | NM_001030287 | Hs.460     | 5.48      | 1.43 |
| 220987_s_at  | C11orf17, NUAK2                           | NM_020642    | Hs.131180  | 5.47      | 1.06 |
| 215495_s_at  | SAMD4                                     | NM_015589    | Hs.98259   | 5.42      | 0.96 |
| 211414_at    | GLS                                       | NM_014905    | Hs.116448  | 5.17      | 1.02 |
| 238725_at    | IRF1                                      | NM_002198    | Hs.436061  | 5.10      | 1.18 |
| 202014_at    | PPP1R15A                                  | NM_014330    | Hs.76556   | 5.09      | 1.31 |
| 202643_s_at  | TNFAIP3                                   | NM_006290    | Hs.211600  | 5.06      | 1.07 |
| 230542_at    | ZNF597                                    | NM_152457    | Hs.88630   | 4.85      | 0.86 |
| 236898_at    | transcribed locus                         |              | Hs.550924  | 4.79      | 0.95 |
| 37028_at     | PPP1R15A                                  | NM_014330    | Hs.76556   | 4.56      | 1.55 |
| 209636_at    | NFKB2                                     | NM_002502    | Hs.73090   | 4.56      | 1.15 |
| 202638_s_at  | ICAM1                                     | NM_000201    | Hs.515126  | 4.39      | 0.85 |
| 207113_s_at  | TNF                                       | NM_000594    | Hs.241570  | 4.33      | 0.89 |
| 202023_at    | EFNA1                                     | NM_004428    | Hs.516664  | 4.32      | 1.31 |
| 209457_at    | DUSP5                                     | NM_004419    | Hs.2128    | 4.26      | 0.89 |
| 236987_at    | IMAGE:2365727                             |              |            | 4.14      | 1.13 |
| 221530_s_at  | BHLHB3                                    | NM_030762    | Hs.177841  | 4.06      | 1.32 |
| 234799_at    | ADARB1                                    | NM_001033049 | Hs.474018  | 3.98      | 0.88 |
| 214472_at    | HIST1H3D                                  | NM_003530    | Hs.532144  | 3.92      | 1.76 |
| 221728_x_at  | XIST                                      | NR_001564    | Hs.529901  | 3.87      | 1.06 |
| 36711_at     | MAFF                                      | NM_012323    | Hs.517617  | 3.87      | 1.43 |
| 222802_at    | EDN1                                      |              |            | 3.81      | 1.06 |
| 218880_at    | FOSL2                                     | NM_005253    | Hs.220971  | 3.79      | 1.04 |
| 203725_at    | GADD45A                                   | NM_001924    | Hs.80409   | 3.77      | 1.30 |
| 202644_s_at  | TNFAIP3                                   | NM_006290    | Hs.211600  | 3.70      | 1.12 |

| Name          | Gene Symbol (Genedata An | RefSeq Transcrip | UniGene [A] | HeLa 500/0 | Hek 500/0 |
|---------------|--------------------------|------------------|-------------|------------|-----------|
| 223196_s_at   | SESN2                    | NM_031459        | Hs.469543   | 3.66       | 1.25      |
| 225142_at     | KIAA1718                 | XM_376680        | Hs.308710   | 3.57       | 1.79      |
| 219826_at     | ZNF419                   | NM_024691        | Hs.98593    | 3.57       | 1.42      |
| 36829_at      | PER1                     | NM_002616        | Hs.445534   | 3.53       | 0.71      |
| 213146_at     | KIAA0346                 |                  |             | 3.52       | 1.13      |
| 213649_at     | SFRS7                    | NM_001031684     | Hs.309090   | 3.47       | 2.38      |
| 227458_at     | CD274                    | NM_014143        | Hs.521989   | 3.45       | 1.06      |
| 229520_s_at   | C14orf118                | NM_017926        | Hs.410231   | 3.43       | 1.76      |
| 229344_x_at   | FAM80B                   | NM_020734        | Hs.504670   | 3.43       | 2.74      |
| 218995_s_at   | EDN1                     | NM_001955        | Hs.511899   | 3.40       | 0.87      |
| 214185_at     | KHDRBS1                  | NM_006559        | Hs.445893   | 3.38       | 5.69      |
| 1558305_at    | TNRC15                   | NM_015575        | Hs.435841   | 3.38       | 0.96      |
| 235857_at     | KCTD11                   | NM_001002914     | Hs.585037   | 3.35       | 0.77      |
| 209383_at     | DDIT3                    | NM_004083        | Hs.505777   | 3.33       | 1.34      |
| 210538_s_at   | BIRC3                    | NM_001165        | Hs.127799   | 3.33       | 0.94      |
| 225557_at     | AXUD1                    | NM_033027        | Hs.370950   | 3.33       | 1.64      |
| 204907_s_at   | BCL3                     | NM_005178        | Hs.31210    | 3.31       | 0.99      |
| 221805_at     | NEFL                     | NM_006158        | Hs.521461   | 3.26       | 0.94      |
| 203927_at     | NFKBIE                   | NM_004556        | Hs.458276   | 3.23       | 1.28      |
| 214447_at     | ETS1                     | NM_005238        | Hs.369438   | 3.20       | 1.10      |
| 1554283_at    | CCRN4L                   | NM_012118        | Hs.548091   | 3.19       | 1.21      |
| 212471_at     | KIAA0241                 | NM_015060        | Hs.128056   | 3.13       | 1.25      |
| 215243_s_at   | GJB3                     | NM_001005752     | Hs.522561   | 3.13       | 1.09      |
| 221602_s_at   | FAIM3                    | NM_005449        | Hs.58831    | 3.09       | 1.37      |
| 202637_s_at   | ICAM1                    | NM_000201        | Hs.515126   | 3.09       | 1.01      |
| 1559064_at    | NUP153                   | NM_005124        | Hs.121088   | 3.08       | 1.33      |
| 218280_x_at   | HIST2H2AA                | NM_003516        | Hs.530461   | 3.07       | 1.59      |
| 233245_at     | C6orf107                 | NM_017754        | Hs.555954   | 3.04       | 1.18      |
| 235128_at     | SYNPO                    | NM_007286        | Hs.435228   | 3.04       | 0.91      |
| 238422_at     | LOC151534                |                  | Hs.516124   | 3.03       | 1.13      |
| 1559060_a_at  | KIAA1961                 | NM_001008738     | Hs.483329   | 3.03       | 0.95      |
| 210069_at     | CHKB, CPT1B              | NM_004377        | Hs.439777   | 3.02       | 1.51      |
| 202861_at     | PER1                     | NM_002616        | Hs.445534   | 3.00       | 0.87      |
| 208180_s_at   | HIST1H4H                 | NM_003543        | Hs.421737   | 3.00       | 2.23      |
| 202150_s_at   | NEDD9                    | NM_006403        | Hs.37982    | 2.99       | 1.05      |
| 214502_at     | HIST1H2BJ                | NM_021058        | Hs.132550   | 2.99       | 1.22      |
| AFFX-M27830_5 | 28S rRNA                 |                  |             | 2.98       | 1.25      |
| 201694_s_at   | EGR1                     | NM_001964        | Hs.326035   | 2.98       | 1.12      |
| 240982_at     | CARS                     | NM_001014437     | Hs.274873   | 2.98       | 1.12      |
| 223780_s_at   | THRAP1                   | NM_005121        | Hs.282678   | 2.98       | 1.72      |
| 218881_s_at   | FOSL2                    | NM_005253        | Hs.568265   | 2.96       | 1.00      |
| 223217_s_at   | NFKBIZ                   | NM_001005474     | Hs.319171   | 2.95       | 0.87      |
| 230283_at     | NEURL2                   | NM_080749        | Hs.517094   | 2.95       | 1.28      |
| 238476_at     | LOC153222                | NM_153607        | Hs.484195   | 2.95       | 1.32      |
| 231146_at     | FAM24B                   | NM_152644        |             | 2.94       | 2.76      |
| 206144_at     | MAGI1                    | NM_001033057     | Hs.567389   | 2.94       | 1.29      |
| 214522_x_at   | HIST1H3D                 | NM_003530        | Hs.532144   | 2.92       | 1.11      |
| 207535_s_at   | NFKB2                    | NM_002502        | Hs.73090    | 2.91       | 1.05      |
| 228153_at     | IBRDC2                   | NM_182757        | Hs.148741   | 2.90       | 1.10      |
| 204035_at     | SCG2                     | NM_003469        | Hs.516726   | 2.90       | 1.28      |
| 202821_s_at   | LPP                      | NM_005578        | Hs.444362   | 2.90       | 0.96      |
| 214455_at     | HIST1H2BC                | NM_003526        | Hs.546314   | 2.89       | 0.92      |
| 209010_s_at   | TRIO                     | NM_007118        | Hs.130031   | 2.88       | 0.99      |
| 236947_at     | SEMA3C                   | NM_006379        | Hs.269109   | 2.88       | 1.15      |
| 1554420_at    | ATF3                     | NM_001030287     | Hs.460      | 2.87       | 1.15      |
| 58367_s_at    | ZNF419                   | NM_024691        | Hs.98593    | 2.87       | 1.30      |
| 223773_s_at   | C1orf79                  | XM_378848        | Hs.528699   | 2.85       | 3.01      |
| 205113_at     | NEF3                     | NM_005382        | Hs.458657   | 2.84       | 1.05      |
| 231468_at     | IMAGE:3134456            |                  |             | 2.84       | 1.15      |
| 210587_at     | INHBE                    | NM_031479        | Hs.279497   | 2.83       | 3.33      |

| Name         | Gene Symbol (Genedata An | RefSeq Transcrip | UniGene [A] | HeLa 500/0 | Hek 500/0 |
|--------------|--------------------------|------------------|-------------|------------|-----------|
| 225015_s_at  | STK40                    | NM_032017        | Hs.471768   | 2.81       | 0.93      |
| 230973_at    | SH2D5                    | XM_375698        | Hs.166270   | 2.80       | 0.96      |
| 206374_at    | DUSP8                    | NM_004420        | Hs.41688    | 2.78       | 1.37      |
| 235737_at    | TSLP                     | NM_033035        | Hs.389874   | 2.76       | 1.30      |
| 211286_x_at  | CSF2RA                   | NM_006140        | Hs.520937   | 2.74       | 1.15      |
| 227180_at    | ELOVL7                   | NM_024930        | Hs.274256   | 2.72       | 0.91      |
| 210070_s_at  | CHKB, CPT1B              | NM_004377        | Hs.439777   | 2.70       | 1.39      |
| 230104_s_at  | TPPP                     | NM_007030        | Hs.584860   | 2.69       | 0.81      |
| 1554997_a_at | PTGS2                    | NM_000963        | Hs.196384   | 2.68       | 0.95      |
| 209912_s_at  | KIAA0415                 | XM_166527        | Hs.558440   | 2.66       | 1.36      |
| 203372_s_at  | SOCS2                    | NM_003877        | Hs.485572   | 2.66       | 1.43      |
| 209908_s_at  | TGFB2                    | NM_003238        | Hs.133379   | 2.63       | 1.06      |
| 206411_s_at  | ABL2                     | NM_005158        | Hs.159472   | 2.63       | 0.67      |
| 214290_s_at  | HIST2H2AA                | NM_003516        | Hs.530461   | 2.63       | 1.62      |
| 223195_s_at  | SESN2                    | NM_031459        | Hs.469543   | 2.62       | 1.40      |
| 228946_at    | PDZK6                    | NM_015693        | Hs.391481   | 2.60       | 1.77      |
| 1555614_at   | IMAGE:3538202            |                  |             | 2.59       | 1.11      |
| 217127_at    | CTH                      | NM_001902        | Hs.19904    | 2.59       | 1.90      |
| 220324_at    | C6orf155                 | NM_024882        | Hs.368337   | 2.59       | 1.11      |
| 206359_at    | SOCS3                    | NM_003955        | Hs.527973   | 2.58       | 0.77      |
| 215501_s_at  | DUSP10                   | NM_007207        | Hs.497822   | 2.58       | 1.50      |
| 213900_at    | C9orf61                  | NM_004816        | Hs.118003   | 2.56       | 0.74      |
| 1555355_a_at | ETS1                     | NM_005238        | Hs.369438   | 2.55       | 0.55      |
| 226612_at    | FLJ25076                 | XM_059689        | Hs.126856   | 2.54       | 1.70      |
| 243894_at    | SLC41A2                  | NM_032148        | Hs.238996   | 2.54       | 1.28      |
| 205749_at    | CYP1A1                   | NM_000499        | Hs.72912    | 2.54       | 1.32      |
| 225840_at    | TEF                      | NM_003216        | Hs.181159   | 2.54       | 0.95      |
| 223878_at    | INPP4B                   | NM_003866        | Hs.480837   | 2.54       | 1.07      |
| 240454_at    | TTC7A                    | NM_020458        | Hs.370603   | 2.54       | 0.87      |
| 209401_s_at  | SLC12A4                  | NM_005072        | Hs.10094    | 2.53       | 1.25      |
| 236402_at    | IMAGE:2664543            |                  |             | 2.53       | 1.34      |
| 229069_at    | CIP29                    | NM_033082        | Hs.505676   | 2.53       | 3.30      |
| 215078_at    | SOD2                     | NM_000636        | Hs.487046   | 2.52       | 1.05      |
| 1555441_at   | FLJ10808                 | NM_018227        | Hs.212774   | 2.51       | 0.95      |
| 214138_at    | ZNF79                    | NM_007135        | Hs.522399   | 2.50       | 1.89      |
| 220994_s_at  | STXBP6                   | NM_014178        | Hs.508958   | 2.49       | 0.99      |
| 205816_at    | ITGB8                    | NM_002214        | Hs.285724   | 2.48       | 0.91      |
| 219256_s_at  | SH3TC1                   | NM_018986        | Hs.479116   | 2.48       | 0.99      |
| 201009_s_at  | TXNIP                    | NM_006472        | Hs.533977   | 2.47       | 1.07      |
| 244852_at    | C18orf4                  | NM_032160        | Hs.124673   | 2.47       | 1.19      |
| 220046_s_at  | CCNL1                    | NM_020307        | Hs.4859     | 2.46       | 1.47      |
| 202708_s_at  | HIST2H2BE                | NM_003528        | Hs.2178     | 2.45       | 1.50      |
| 203373_at    | SOCS2                    | NM_003877        | Hs.485572   | 2.45       | 1.35      |
| 1559257_a_at | MAGI1                    | NM_001033057     | Hs.567389   | 2.44       | 1.09      |
| 206864_s_at  | HRK                      | NM_003806        | Hs.87247    | 2.44       | 1.37      |
| 1552314_a_at | EYA3                     | NM_001990        | Hs.185774   | 2.44       | 1.48      |
| 234902_s_at  | ZNF416                   | NM_017879        | Hs.247711   | 2.44       | 1.53      |
| 227599_at    | LOC151963                | NM_178496        | Hs.151443   | 2.43       | 0.90      |
| 243861_at    | KIAA1961                 | NM_001008738     | Hs.483329   | 2.43       | 1.33      |
| 214482_at    | ZBTB25                   | NM_006977        | Hs.164347   | 2.43       | 1.17      |
| 216549_s_at  | TBC1D22B                 | NM_017772        | Hs.485270   | 2.42       | 0.81      |
| 1554229_at   | LOC153222                | NM_153607        | Hs.484195   | 2.42       | 0.94      |
| 242316_at    | transcribed locus        |                  | Hs.511399   | 2.42       | 1.12      |
| 226847_at    | FST                      | NM_006350        | Hs.9914     | 2.41       | 1.24      |
| 220671_at    | CCRN4L                   | NM_012118        | Hs.548091   | 2.40       | 0.98      |
| 201531_at    | ZFP36                    | NM_003407        | Hs.534052   | 2.40       | 1.05      |
| 238660_at    | WDFY3                    | NM_014991        | Hs.480116   | 2.39       | 2.57      |
| 204200_s_at  | PDGFB                    | NM_002608        | Hs.1976     | 2.39       | 0.94      |
| 203010_at    | STAT5A                   | NM_003152        | Hs.437058   | 2.39       | 1.15      |
| 207510_at    | BDKRB1                   | NM_000710        | Hs.553486   | 2.39       | 1.12      |

| Name         | Gene Symbol (Genedata An | RefSeq Transcrip | UniGene [A] | HeLa 500/0 | Hek 500/0 |
|--------------|--------------------------|------------------|-------------|------------|-----------|
| 241529_at    | FLJ20397                 | NM_017802        | Hs.521328   | 2.38       | 1.10      |
| 207085_x_at  | CSF2RA                   | NM_006140        | Hs.520937   | 2.38       | 1.17      |
| 227404_s_at  | EGR1                     | NM_001964        | Hs.326035   | 2.38       | 1.11      |
| 1559826_a_at | LOC401074                | XM_376247        | Hs.528540   | 2.36       | 1.23      |
| 227392_at    | NISCH                    | NM_007184        | Hs.435290   | 2.36       | 1.37      |
| 241396_at    | IMAGE:4693718            |                  |             | 2.36       | 0.82      |
| 204472_at    | GEM                      | NM_005261        | Hs.345139   | 2.36       | 1.01      |
| 222142_at    | CYLD                     | NM_015247        | Hs.432993   | 2.35       | 1.28      |
| 38037_at     | HBEGF                    | NM_001945        | Hs.799      | 2.35       | 0.73      |
| 204549_at    | IKBKE                    | NM_014002        | Hs.321045   | 2.34       | 1.11      |
| 1559051_s_at | C6orf150                 | NM_138441        | Hs.344080   | 2.33       | 1.09      |
| 216200_at    | PLEKHM1                  | NM_014798        | Hs.514242   | 2.33       | 1.16      |
| 227301_at    | LOC441241, LOC441244     | XM_496886        | Hs.488399   | 2.33       | 3.33      |
| 203249_at    | EZH1                     | NM_001991        | Hs.194669   | 2.33       | 0.87      |
| 204958_at    | PLK3                     | NM_004073        | Hs.153640   | 2.32       | 1.16      |
| 1555411_a_at | CCNL1                    | NM_020307        | Hs.4859     | 2.32       | 1.43      |
| 203691_at    | PI3                      | NM_002638        | Hs.112341   | 2.31       | 1.13      |
| 233112_at    | C9orf150                 | NM_203403        | Hs.445356   | 2.30       | 1.00      |
| 208094_s_at  | MGC10471                 | NM_030818        | Hs.24998    | 2.30       | 1.69      |
| 206566_at    | SLC7A1                   | NM_003045        | Hs.14846    | 2.29       | 0.94      |
| 218000_s_at  | PHLDA1                   | NM_007350        | Hs.484885   | 2.29       | 1.01      |
| 213353_at    | ABCA5                    | NM_018672        | Hs.421474   | 2.28       | 1.16      |
| 221603_at    | PEX16                    | NM_004813        | Hs.100915   | 2.27       | 0.95      |
| 206926_s_at  | IL11                     | NM_000641        | Hs.467304   | 2.27       | 1.05      |
| 218847_at    | IMP-2                    | NM_001007225     | Hs.35354    | 2.27       | 1.02      |
| 206175_x_at  | ZNF222                   | NM_013360        | Hs.279840   | 2.27       | 1.82      |
| 224978_s_at  | USP36                    | NM_025090        | Hs.464243   | 2.27       | 1.04      |
| 1554986_a_at | SNX19                    | NM_014758        | Hs.444024   | 2.27       | 1.12      |
| 210004_at    | OLR1                     | NM_002543        | Hs.412484   | 2.26       | 0.87      |
| 220606_s_at  | NBLA03831                | NM_020233        | Hs.47668    | 2.25       | 1.29      |
| 237439_at    | USP43                    | XM_371015        | Hs.23935    | 2.25       | 0.99      |
| 232035_at    | HIST1H4H                 | NM_003543        | Hs.421737   | 2.25       | 2.10      |
| 235686_at    | FLJ37953                 | NM_152382        | Hs.204619   | 2.25       | 2.20      |
| 211038_s_at  | MGC12760                 | XM_496351        | Hs.522876   | 2.24       | 1.71      |
| 1568695_s_at | DDX26                    | NM_012141        | Hs.439440   | 2.23       | 0.87      |
| 236117_at    | transcribed locus        |                  | Hs.42747    | 2.23       | 1.12      |
| 209832_s_at  | CDT1                     | NM_030928        | Hs.122908   | 2.22       | 1.25      |
| 207219_at    | ZNF643                   | NM_023070        | Hs.133034   | 2.22       | 1.64      |
| 1558290_a_at | LOC441378, PVT1          | XM_372058        | Hs.133107   | 2.21       | 2.78      |
| 202500_at    | DNAJB2                   | NM_006736        | Hs.77768    | 2.21       | 1.42      |
| 203439_s_at  | STC2                     | NM_003714        | Hs.233160   | 2.21       | 1.59      |
| 209850_s_at  | CDC42EP2                 | NM_006779        | Hs.343380   | 2.21       | 0.81      |
| 227486_at    | NT5E                     | NM_002526        | Hs.153952   | 2.21       | 0.89      |
| 232832_at    | DKFZp434J0226            | XM_375629        | Hs.466975   | 2.20       | 1.06      |
| 241433_at    | RCOR3                    | NM_018254        | Hs.356399   | 2.20       | 0.65      |
| 229264_at    | PARP8                    | NM_024615        | Hs.369581   | 2.20       | 1.65      |
| 235914_at    | SYNPO                    | NM_007286        | Hs.435228   | 2.20       | 0.97      |
| 209959_at    | NR4A3                    | NM_006981        | Hs.279522   | 2.20       | 1.09      |
| 205181_at    | ZNF193                   | NM_006299        | Hs.100921   | 2.20       | 1.52      |
| 214520_at    | FOXC2                    | NM_005251        | Hs.558329   | 2.19       | 1.04      |
| 1565579_at   | TATDN2                   | NM_014760        | Hs.475401   | 2.19       | 0.99      |
| 238910_at    | MGC3020                  | NM_024048        | Hs.460642   | 2.18       | 1.16      |
| 206673_at    | GPR                      | NM_007223        | Hs.37196    | 2.18       | 0.77      |
| 213139_at    | SNAI2                    | NM_003068        | Hs.360174   | 2.18       | 1.04      |
| 244441_at    | USP31                    | NM_020718        | Hs.183817   | 2.18       | 0.97      |
| 203602_s_at  | ZBTB17                   | NM_003443        | Hs.433764   | 2.18       | 1.13      |
| 231963_at    | IMAGE:3869276            |                  | Hs.26039    | 2.18       | 0.66      |
| 201010_s_at  | TXNIP                    | NM_006472        | Hs.533977   | 2.17       | 1.08      |
| 202847_at    | PCK2                     | NM_001018073     | Hs.75812    | 2.17       | 1.31      |
| 225979_at    | PLEKHG2                  | NM_022835        | Hs.111217   | 2.17       | 0.80      |

| Name         | Gene Symbol (Genedata An | RefSeq Transcrip | UniGene [A]  | HeLa 500/0 | Hek 500/0 |
|--------------|--------------------------|------------------|--------------|------------|-----------|
| 205228_at    | RBMS2                    | NM_002898        | Hs.505729    | 2.17       | 1.04      |
| 1555007_s_at | WDR66                    | NM_144668        | Hs.507125    | 2.16       | 1.08      |
| 203828_s_at  | IL32                     | NM_001012631     | Hs.943       | 2.16       | 1.23      |
| 205207_at    | IL6                      | NM_000600        | Hs.512234    | 2.16       | 0.75      |
| 213323_s_at  | ZC3H7B                   | NM_017590        | Hs.474970    | 2.16       | 0.91      |
| 226206_at    | MAFK                     | NM_002360        | Hs.584824    | 2.16       | 0.85      |
| 216271_x_at  | SYDE1                    | NM_033025        | Hs.528701    | 2.15       | 0.84      |
| 206744_s_at  | ZMYM5                    | NM_014242        | Hs.530988    | 2.15       | 1.81      |
| 208436_s_at  | IRF7                     | NM_001572        | Hs.166120    | 2.15       | 1.74      |
| 232076_at    | ZNF707                   | NM_173831        | Hs.521922    | 2.15       | 0.91      |
| 214443_at    | PVR                      | NM_006505        | Hs.171844    | 2.15       | 0.78      |
| 206523_at    | PSCD3                    | NM_004227        | Hs.487479    | 2.15       | 0.86      |
| 220121_at    | LINS1                    | NM_018148        | Hs.105633    | 2.15       | 1.39      |
| 243560_at    | transcribed locus        |                  | Hs.553158    | 2.15       | 0.97      |
| 227140_at    | INHBA                    | NM_002192        | Hs.28792     | 2.14       | 1.04      |
| 237367_x_at  | CFLAR                    | NM_003879        | Hs.390736    | 2.14       | 0.88      |
| 221563_at    | DUSP10                   | NM_007207        | Hs.497822    | 2.14       | 1.41      |
| 210387_at    | HIST1H2BG                | NM_003518        | Hs.240135    | 2.14       | 1.20      |
| 205490_x_at  | GJB3                     | NM_001005752     | Hs.522561    | 2.14       | 1.18      |
| 1554291_at   | KIAA0701                 | NM_001006947     | Hs.387336    | 2.14       | 0.88      |
| 219492_at    | CHIC2                    | NM_012110        | Hs.335393    | 2.13       | 1.35      |
| 209193_at    | PIM1                     | NM_002648        | Hs.81170     | 2.13       | 1.03      |
| 1560485_at   | HIVEP1                   | NM_002114        | Hs.567284    | 2.13       | 1.00      |
| 230013_s_at  | ARHGAP23                 | XM_290799        | Hs.374446    | 2.12       | 1.05      |
| 230450_at    | IMAGE:2357664            |                  |              | 2.12       | 1.10      |
| 218724_s_at  | TGIF2                    | NM_021809        | Hs.292281    | 2.12       | 1.13      |
| 202902_s_at  | CTSS                     | NM_004079        | Hs.181301    | 2.12       | 1.00      |
| 207110_at    | KCNJ12                   | NM_021012        | Hs.200629    | 2.12       | 0.70      |
| 229468_at    | CDK3                     | NM_001258        | Hs.584745    | 2.11       | 0.95      |
| 208284_x_at  | GGT1                     | NM_001032364     | Hs.444164    | 2.11       | 1.06      |
| 236657_at    | cDNA YI37C01             |                  | Hs.432924    | 2.11       | 0.85      |
| 225220_at    | ACA24 snoRNA gene        |                  | Hs.535762    | 2.11       | 1.75      |
| 1554014_at   | CHD2                     | NM_001271        | Hs.220864    | 2.11       | 1.80      |
| 210190_at    | STX11                    | NM_003764        | Hs.118958    | 2.10       | 0.91      |
| 235414_at    | ZNF383                   | NM_152604        | Hs.567750    | 2.10       | 1.31      |
| 211468_s_at  | RECQL5                   | NM_001003715     | Hs.514480    | 2.10       | 1.28      |
| 1558212_at   | FLJ35024                 | XM_379622        | Hs.416043    | 2.10       | 1.96      |
| 1557257_at   | IMAGE:1628131            |                  |              | 2.10       | 0.89      |
| 211605_s_at  | RARA                     | NM_000964        | Hs.535499    | 2.10       | 0.94      |
| 205807_s_at  | TUFT1                    | NM_020127        | Hs.489922    | 2.09       | 1.31      |
| 235062_at    | LOC120379                | NM_138789        | Hs.420662    | 2.09       | 1.16      |
| 227347_x_at  | HES4                     | NM_021170        | Hs.154029    | 2.09       | 1.01      |
| 238624_at    | NLK                      | NM_016231        | Hs.208759    | 2.09       | 1.34      |
| 201008_s_at  | TXNIP                    | NM_006472        | Hs.533977    | 2.09       | 0.88      |
| 206044_s_at  | BRAF                     | NM_004333        | Hs.324250    | 2.08       | 1.39      |
| 235116_at    | TRAF1                    | NM_005658        | Hs.531251    | 2.08       | 1.01      |
| 202684_s_at  | RNMT                     | NM_003799        | Hs.8086      | 2.08       | 1.10      |
| 242827_x_at  | transcribed locus        |                  | Hs.272159    | 2.08       | 0.88      |
| 204015_s_at  | DUSP4                    | NM_001394        | Hs.417962    | 2.08       | 1.13      |
| 220382_s_at  | ARHGAP28                 | NM_001010000     | Hs.183114    | 2.07       | 0.78      |
| 240983_s_at  | CARS                     | NM_001014437     | Hs.274873    | 2.07       | 1.44      |
| 228250_at    | KIAA1961                 | NM_001008738     | Hs.483329    | 2.07       | 0.99      |
| 227452_at    | LOC440462                | XM_498681        | Hs.157726, H | 2.07       | 1.17      |
| 205931_s_at  | CREB5                    | NM_001011666     | Hs.437075    | 2.07       | 1.23      |
| 226462_at    | STXBP6                   | NM_014178        | Hs.508958    | 2.07       | 0.93      |
| 209324_s_at  | RGS16                    | NM_002928        | Hs.413297    | 2.07       | 0.71      |
| 1554274_a_at | SSH1                     | NM_018984        | Hs.199763    | 2.07       | 1.01      |
| 220370_s_at  | USP36                    | NM_025090        | Hs.464243    | 2.07       | 1.08      |
| 212665_at    | TIPARP                   | NM_015508        | Hs.12813     | 2.07       | 1.70      |
| 216262_s_at  | TGIF2                    | NM_021809        | Hs.292281    | 2.06       | 0.89      |

| Name         | Gene Symbol (Genedata An | RefSeq Transcrip | UniGene [A]  | HeLa 500/0 | Hek 500/0 |
|--------------|--------------------------|------------------|--------------|------------|-----------|
| 242727_at    | ARL8                     | NM_178815        | Hs.25362     | 2.06       | 1.11      |
| 226991_at    | NFATC2                   | NM_012340        | Hs.356321    | 2.06       | 0.94      |
| 224739_at    | PIM3                     | NM_001001852     | Hs.530381    | 2.06       | 1.03      |
| 204420_at    | FOSL1                    | NM_005438        | Hs.283565    | 2.06       | 0.83      |
| 221308_at    | FRS2                     | NM_006654        | Hs.334831    | 2.06       | 0.88      |
| 207046_at    | HIST2H4                  | NM_003548        | Hs.534370    | 2.05       | 5.75      |
| 207082_at    | CSF1                     | NM_000757        | Hs.173894    | 2.05       | 0.96      |
| 235558_at    | RBMS2                    | NM_002898        | Hs.505729    | 2.05       | 0.84      |
| 228442_at    | NFATC2                   | NM_012340        | Hs.356321    | 2.04       | 0.92      |
| 1553986_at   | RASEF                    | NM_152573        | Hs.129136    | 2.04       | 1.08      |
| 211527_x_at  | VEGF                     | NM_001025366     | Hs.73793     | 2.04       | 1.01      |
| 31846_at     | RHOD                     | NM_014578        | Hs.15114     | 2.04       | 0.86      |
| 211416_x_at  | GGTLA4                   | NM_080920        | Hs.355394    | 2.04       | 1.20      |
| 228856_at    | MGC2474                  | NM_023931        | Hs.460604    | 2.03       | 1.60      |
| 206388_at    | PDE3A                    | NM_000921        | Hs.386791    | 2.03       | 1.11      |
| 236631_at    | C21orf125                | NM_194309        | Hs.146127    | 2.03       | 1.00      |
| 1559929_at   | IMAGE:4042121            |                  | Hs.350952    | 2.03       | 1.02      |
| 228230_at    | PRIC285                  | NM_033405        | Hs.517180    | 2.03       | 0.83      |
| 213556_at    | LOC390940                | XM_372732        | Hs.22049     | 2.03       | 1.05      |
| 205590_at    | RASGRP1                  | NM_005739        | Hs.511010    | 2.03       | 1.05      |
| 223937_at    | FOXP1                    | NM_001012505     | Hs.431498    | 2.03       | 1.04      |
| 235456_at    | HIST1H2BD                | NM_021063        | Hs.130853    | 2.02       | 1.49      |
| 202912_at    | ADM                      | NM_001124        | Hs.441047    | 2.01       | 0.99      |
| 228298_at    | MGC16044                 | NM_138371        | Hs.258002    | 2.01       | 1.02      |
| 201044_x_at  | DUSP1                    | NM_004417        | Hs.171695    | 2.01       | 0.96      |
| 239678_at    | AP1GBP1                  | NM_007247        | Hs.101480    | 2.01       | 1.27      |
| 209239_at    | NFKB1                    | NM_003998        | Hs.431926    | 2.01       | 1.03      |
| 236302_at    | PPM1E                    | NM_014906        | Hs.245044    | 2.01       | 1.25      |
| 1553962_s_at | RHOB                     | NM_004040        | Hs.502876    | 2.01       | 0.81      |
| 209230_s_at  | P8                       | NM_012385        | Hs.513463    | 2.00       | 2.63      |
| 211674_x_at  | CTAG1A, CTAG1B           | NM_001327        | Hs.534310    | 2.00       | 1.03      |
| 1554140_at   | WDR78                    | NM_024763        | Hs.49421     | 1.25       | 4.64      |
| 230763_at    | LOC128153                | NM_138796        | Hs.171130    | 0.91       | 4.61      |
| 215071_s_at  | HIST1H2AC                | NM_003512        | Hs.484950    | 1.52       | 4.05      |
| 230142_s_at  | CIRBP                    | NM_001280        | Hs.25489     | 1.62       | 3.86      |
| 1553494_at   | TDH                      | NR_001578        | Hs.130610    | 0.96       | 3.81      |
| 230815_at    | LOC389765                | XM_372122        | Hs.160561    | 1.54       | 3.57      |
| 205278_at    | GAD1                     | NM_000817        | Hs.420036    | 1.27       | 3.54      |
| 223714_at    | ZNF256                   | NM_005773        | Hs.288736    | 1.01       | 3.41      |
| 1562309_s_at | PHF21B                   | NM_138415        | Hs.254097    | 0.76       | 3.21      |
| 230861_at    | CHRNA7                   |                  |              | 0.90       | 3.17      |
| 222612_at    | PSPC1                    | NM_018282        | Hs.213198    | 1.59       | 3.05      |
| 232611_at    | LOC92497                 |                  | Hs.524660    | 1.46       | 3.03      |
| 231945_at    | FILIP1                   | NM_015687        | Hs.526972    | 0.94       | 3.00      |
| 1555151_s_at | TDH                      | NR_001578        | Hs.130610    | 0.84       | 2.97      |
| 236706_at    | LOC129530                | NM_174898        | Hs.164589    | 1.28       | 2.97      |
| 207166_at    | GNGT1                    | NM_021955        | Hs.555871    | 1.23       | 2.97      |
| 218371_s_at  | PSPC1                    | NM_018282        | Hs.213198    | 1.45       | 2.96      |
| 230795_at    | HIST2H4                  | NM_003548        | Hs.55468     | 1.42       | 2.95      |
| 219455_at    | FLJ21062                 | NM_024788        | Hs.521012    | 1.49       | 2.89      |
| 1561759_at   | LOC441038                | XM_376342        | Hs.535008    | 1.08       | 2.84      |
| 1561761_x_at | LOC441038                | XM_376342        | Hs.535008, H | 1.61       | 2.81      |
| 239282_at    | CCDC41                   | NM_016122        | Hs.279209    | 0.91       | 2.73      |
| 241348_at    | ZNF654                   | NM_018293        | Hs.27595     | 1.00       | 2.72      |
| 209602_s_at  | GATA3                    | NM_001002295     | Hs.524134    | 1.00       | 2.65      |
| 242586_at    | FSD1CL                   | NM_207647        | Hs.136901    | 1.03       | 2.64      |
| 228209_at    | clone NT2NE2013189       |                  | Hs.537031    | 1.24       | 2.60      |
| 242807_at    | FSD1L                    | NM_207647        | Hs.136901    | 1.38       | 2.59      |
| 202086_at    | MX1                      | NM_002462        | Hs.517307    | 1.71       | 2.57      |
| 220366_at    | ELSPBP1                  | NM_022142        | Hs.104894    | 1.12       | 2.55      |



| Name         | Gene Symbol (Genedata An | RefSeq Transcrip | UniGene [A] | HeLa 500/0 | Hek 500/0 |
|--------------|--------------------------|------------------|-------------|------------|-----------|
| 224165_s_at  | FLJ12476                 | NM_001031715     | Hs.444535   | 1.58       | 2.55      |
| 213938_at    | CAST1                    | NM_015576        |             | 0.77       | 2.54      |
| 208886_at    | H1F0                     | NM_005318        | Hs.226117   | 1.04       | 2.49      |
| 234040_at    | HELLS                    | NM_018063        | Hs.463677   | 1.77       | 2.46      |
| 1562904_s_at | Clone PP1195             |                  | Hs.571462   | 1.04       | 2.46      |
| 204919_at    | PRR4                     | NM_007244        | Hs.533634   | 1.02       | 2.43      |
| 1564282_a_at | LOC285708                |                  |             | 0.89       | 2.39      |
| 1558651_at   | CCDC28A                  | NM_015439        | Hs.412019   | 1.15       | 2.39      |
| 205185_at    | SPINK5                   | NM_006846        | Hs.331555   | 1.11       | 2.39      |
| 233141_s_at  | ST7L                     | NM_017744        | Hs.201921   | 1.98       | 2.37      |
| 226164_x_at  | FAM80B                   | NM_020734        | Hs.504670   | 1.88       | 2.35      |
| 214079_at    | DHRS2                    | NM_005794        | Hs.272499   | 1.16       | 2.35      |
| 1564474_at   | LOC285711                | XM_211988        | Hs.161338   | 1.02       | 2.35      |
| 205896_at    | SLC22A4                  | NM_003059        | Hs.310591   | 1.15       | 2.33      |
| 242639_at    | NARG2                    | NM_001018089     | Hs.200943   | 1.19       | 2.31      |
| 222728_s_at  | MGC5306                  | NM_024116        | Hs.355750   | 1.95       | 2.31      |
| 215559_at    | ABCC6                    | NM_001171        | Hs.442182   | 1.13       | 2.31      |
| 232158_x_at  | NPAL1                    | NM_207330        | Hs.134190   | 0.63       | 2.29      |
| 230536_at    | PBX4                     | NM_025245        | Hs.466257   | 1.08       | 2.28      |
| 1554614_a_at | PTBP2                    | NM_021190        | Hs.269895   | 1.72       | 2.26      |
| 219635_at    | ZNF606                   | NM_025027        | Hs.287629   | 1.01       | 2.25      |
| 223589_at    | ZNF416                   | NM_017879        | Hs.247711   | 1.85       | 2.24      |
| 1568838_at   | clone CS0DF033YE17       |                  | Hs.498519   | 1.10       | 2.24      |
| 206463_s_at  | DHRS2                    | NM_005794        | Hs.272499   | 1.43       | 2.24      |
| 222161_at    | NAALAD2                  | NM_005467        | Hs.503560   | 0.90       | 2.23      |
| 214016_s_at  | SFPQ                     | NM_005066        | Hs.355934   | 1.68       | 2.23      |
| 231953_at    | FALZ                     | NM_004459        | Hs.444200   | 1.04       | 2.21      |
| 239812_s_at  | FLJ12476                 | NM_001031715     | Hs.444535   | 1.00       | 2.21      |
| 244190_at    | THAP5                    | NM_182529        | Hs.290259   | 0.87       | 2.20      |
| 1552738_a_at | ST7L                     | NM_017744        | Hs.201921   | 1.30       | 2.19      |
| 205432_at    | OVGP1                    | NM_002557        | Hs.1154     | 1.14       | 2.19      |
| 238658_at    | transcribed locus        |                  | Hs.444083   | 1.01       | 2.19      |
| 202508_s_at  | SNAP25                   | NM_003081        | Hs.167317   | 1.53       | 2.18      |
| 230600_at    | LRRRC46                  | NM_033413        | Hs.130767   | 0.94       | 2.17      |
| 203861_s_at  | ACTN2                    | NM_001103        | Hs.498178   | 0.84       | 2.17      |
| 1569366_a_at | ZNF569                   | NM_152484        | Hs.511848   | 1.02       | 2.16      |
| 234907_x_at  | POLB                     | NM_002690        | Hs.521563   | 1.04       | 2.16      |
| 1556006_s_at | IMAGE:4619723            |                  | Hs.529862   | 1.40       | 2.16      |
| 228497_at    | SLC22A15                 | NM_018420        | Hs.125482   | 1.56       | 2.15      |
| 1557261_at   | LOC339005, LOC440253     | XM_370838        | Hs.558967   | 1.12       | 2.15      |
| 238458_at    | EFHA2                    | NM_181723        | Hs.403594   | 1.09       | 2.15      |
| 231500_s_at  | LOC388221                | XM_370939        | Hs.444600   | 1.22       | 2.15      |
| 220361_at    | FLJ12476                 | NM_001031715     | Hs.444535   | 0.85       | 2.14      |
| 226614_s_at  | C8orf13                  | NM_053279        | Hs.124299   | 0.72       | 2.14      |
| 238695_s_at  | RAB39B                   | NM_171998        | Hs.24970    | 1.02       | 2.13      |
| 241745_at    | clone BRAWH3003343       |                  | Hs.571199   | 0.95       | 2.12      |
| 213908_at    | LOC339005, LOC440253     | XM_370838        | Hs.558967   | 1.10       | 2.12      |
| 1561396_at   | EPHA6                    | XM_114973        | Hs.292059   | 1.10       | 2.10      |
| 228953_at    | KIAA1971                 | XM_058720        | Hs.377360   | 1.84       | 2.09      |
| 203895_at    | PLCB4                    | NM_000933        | Hs.472101   | 1.78       | 2.09      |
| 203896_s_at  | PLCB4                    | NM_000933        | Hs.472101   | 1.45       | 2.08      |
| 204726_at    | CDH13                    | NM_001257        | Hs.436040   | 1.00       | 2.08      |
| 242522_at    | transcribed locus        |                  | Hs.120040   | 1.02       | 2.08      |
| 220369_at    | KIAA2010                 | NM_017936        | Hs.533887   | 1.60       | 2.07      |
| 223791_at    | FAM27B, FAM27C           | XM_499139        | Hs.545934   | 1.60       | 2.07      |
| 225699_at    | LOC285958                |                  | Hs.25892    | 1.86       | 2.06      |
| 216303_s_at  | MTMR1                    | NM_003828        | Hs.347187   | 0.96       | 2.06      |
| 207156_at    | HIST1H2AG                | NM_021064        | Hs.51011    | 0.95       | 2.05      |
| 1554743_x_at | PMS1                     | NM_000534        | Hs.111749   | 1.20       | 2.04      |
| 1569974_x_at | LOC441220                | XM_496867        | Hs.520804   | 1.38       | 2.03      |

| Name         | Gene Symbol (Genedata An | RefSeq Transcrip | UniGene [A] | HeLa 500/0 | Hek 500/0 |
|--------------|--------------------------|------------------|-------------|------------|-----------|
| 205437_at    | ZNF211                   | NM_006385        | Hs.469694   | 1.40       | 2.03      |
| 209824_s_at  | ARNTL                    | NM_001030272     | Hs.65734    | 1.44       | 2.02      |
| 230837_at    | IMAGE:286061             |                  |             | 0.87       | 2.01      |
| 203862_s_at  | ACTN2                    | NM_001103        | Hs.498178   | 0.86       | 2.01      |
| 218683_at    | PTBP2                    | NM_021190        | Hs.269895   | 1.10       | 2.00      |
| 227359_at    | C1orf102                 | NM_145047        | Hs.202207   | 1.35       | 2.00      |
| 1554264_at   | CKAP2                    | NM_018204        | Hs.444028   | 0.81       | 2.00      |
| 203444_s_at  | MTA2                     | NM_004739        | Hs.173043   | 1.26       | 0.50      |
| 239351_at    | IMAGE:1301821            |                  |             | 0.95       | 0.49      |
| 228870_at    | FAM84B                   | NM_174911        | Hs.124951   | 1.02       | 0.49      |
| 237622_at    | IMAGE:1690036            |                  |             | 0.76       | 0.48      |
| 203505_at    | ABCA1                    | NM_005502        | Hs.429294   | 1.16       | 0.48      |
| 207390_s_at  | SMTN                     | NM_006932        | Hs.149098   | 1.22       | 0.48      |
| 1557062_at   | IMAGE:4838183            |                  | Hs.434894   | 1.31       | 0.48      |
| 232282_at    | WNK3                     | NM_001002838     | Hs.92423    | 0.77       | 0.47      |
| 231259_s_at  | CCND2                    | NM_001759        | Hs.376071   | 0.89       | 0.46      |
| 1552658_a_at | NAV3                     | NM_014903        | Hs.306322   | 1.09       | 0.46      |
| 216953_s_at  | WT1                      | NM_000378        | Hs.408453   | 0.66       | 0.43      |
| 236330_at    | clone BRAMY3002120       |                  | Hs.444593   | 1.02       | 0.42      |
| 200952_s_at  | CCND2                    | NM_001759        | Hs.376071   | 0.95       | 0.40      |
| 235102_x_at  | EPN2                     | NM_014964        | Hs.514728   | 1.05       | 0.39      |
| 213854_at    | SYNGR1                   | NM_004711        | Hs.216226   | 0.90       | 0.37      |
| 238320_at    | TncRNA                   |                  | Hs.433995   | 0.28       | 0.69      |
| 232412_at    | clone CAE10055           |                  | Hs.587911   | 0.33       | 0.95      |
| 230930_at    | LOC338620                |                  | Hs.558072   | 0.34       | 1.12      |
| 117_at       | HSPA6                    | NM_002155        | Hs.3268     | 0.34       | 0.83      |
| 212177_at    | C6orf111                 | NM_032870        | Hs.520287   | 0.34       | 0.88      |
| 244503_at    | BDNF                     | NM_001709        | Hs.502182   | 0.35       | 0.88      |
| 234989_at    | TncRNA                   |                  | Hs.433995   | 0.36       | 0.89      |
| 213418_at    | HSPA6                    | NM_002155        | Hs.3268     | 0.38       | 0.88      |
| 234032_at    | ZCCHC7                   | NM_032226        | Hs.571599   | 0.39       | 0.97      |
| 214078_at    | PAK3                     | NM_002578        | Hs.390616   | 0.40       | 0.89      |
| 214587_at    | COL8A1                   | NM_001850        | Hs.134830   | 0.41       | 0.93      |
| 214807_at    | clone DKFZp564O0862      |                  | Hs.99472    | 0.41       | 0.97      |
| 242191_at    | LOC200030, LOC400781     | NM_183372        | Hs.125298   | 0.42       | 1.14      |
| 228620_at    | PRKRA                    | NM_003690        | Hs.405537   | 0.42       | 1.26      |
| 210602_s_at  | CDH6                     | NM_004932        | Hs.171054   | 0.43       | 1.04      |
| 239270_at    | PLCXD3                   | NM_001005473     | Hs.145404   | 0.44       | 1.00      |
| 235030_at    | FAM55C                   | NM_145037        | Hs.130195   | 0.44       | 0.93      |
| 235060_at    | DKFZp547E087             |                  | Hs.531664   | 0.44       | 0.86      |
| 213517_at    | PCBP2                    | NM_005016        | Hs.546271   | 0.44       | 0.69      |
| 230629_s_at  | EP400                    | NM_015409        | Hs.507307   | 0.44       | 0.71      |
| 244043_at    | IMAGE:1700929            |                  |             | 0.45       | 0.85      |
| 215143_at    | FLJ36166                 | NM_182634        | Hs.148768   | 0.46       | 0.82      |
| 206100_at    | CPM                      | NM_001005502     | Hs.567251   | 0.46       | 0.77      |
| 240450_at    | PAPPA                    | NM_002581        | Hs.494928   | 0.47       | 1.08      |
| 236140_at    | GCLM                     | NM_002061        | Hs.315562   | 0.47       | 1.12      |
| 214605_x_at  | GPR1                     | NM_005279        | Hs.184907   | 0.47       | 1.11      |
| 1570482_at   | SLC22A3                  | NM_021977        | Hs.567337   | 0.48       | 0.94      |
| 224875_at    | FLJ37562                 | NM_152409        | Hs.406549   | 0.48       | 0.93      |
| 215470_at    | GTF2H2                   | NM_001515        | Hs.191356   | 0.48       | 0.98      |
| 1556331_a_at | IMAGE:5259142            |                  |             | 0.48       | 1.21      |
| 203913_s_at  | HPGD                     | NM_000860        | Hs.77348    | 0.48       | 0.95      |
| 238635_at    | FLJ21657                 | NM_022483        | Hs.558531   | 0.49       | 1.40      |
| 239960_x_at  | clone SKMUS2001014       |                  | Hs.508823   | 0.49       | 1.35      |
| 243308_at    | MORN1                    | NM_024848        | Hs.567585   | 0.49       | 1.06      |
| 204932_at    | TNFRSF11B                | NM_002546        | Hs.81791    | 0.49       | 0.82      |
| 228353_x_at  | STS-1                    | NM_032873        | Hs.444075   | 0.49       | 1.17      |
| 1554513_s_at | FLJ14640                 | NM_032816        | Hs.317590   | 0.49       | 0.95      |
| 1555778_a_at | POSTN                    | NM_006475        | Hs.136348   | 0.49       | 1.02      |

**Table SIII**

| name                                                 | sequence                      | product length (bp) | note                                   |                 |
|------------------------------------------------------|-------------------------------|---------------------|----------------------------------------|-----------------|
| <b>genotyping, T1 treatment and editing analysis</b> |                               |                     |                                        |                 |
| MosE.fwd                                             | GAGCAAGACGTTTGTAAGATCA        | 268                 | editing analysis                       |                 |
| MosE.rev                                             | TGCTCAAGGGGCTTCATGATGT        |                     |                                        |                 |
| Mos 3.fwd                                            | CTCTTTTGAATCACCCCTAAGGG       | 317                 | transgene genotyping                   |                 |
| MosIR+3.rev                                          | GCTGTTTCATATACTGATGACCTCTTTAT |                     |                                        |                 |
| MosIR.fwd                                            | ACTCTTTTGAATCACCCCTAAGCC      | 316                 |                                        |                 |
| MosIR+3.rev                                          | GCTGTTTCATATACTGATGACCTCTTTAT |                     |                                        |                 |
| MosP.fwd                                             | GAGCAAGACGTTTGTAAGATCA        | 241                 |                                        |                 |
| MosP.rev                                             | AGATGGGGAGAGTGAAGACAAGA       |                     |                                        |                 |
| Egfp.fwd                                             | GCACCATCTTCTTCAAGGACGAC       | 343                 |                                        |                 |
| Egfp.rev                                             | TCTTTGCTCAGGGCGGACTG          |                     |                                        |                 |
| MosT1.Fwd                                            | CAACGTGACTCTACACCAAGTC        | 204                 | amplification after RNase T1 treatment |                 |
| MosT1.Rev                                            | ATCTTACAAACGTCTTGCTCACTG      |                     |                                        |                 |
| <b>qPCR mouse</b>                                    |                               |                     |                                        |                 |
| Mos.fwd                                              | GGGAACAGGTATGTCTGATGCA        | 75                  | qPCR                                   |                 |
| Mos.rev                                              | CACCGTGGTAAGTGGCTTTATAACA     |                     |                                        |                 |
| Mos3.fwd                                             | CTCTTTTGAATCACCCCTAAGGG       | 102                 |                                        |                 |
| MosIR+3q.rev                                         | GCCAGAAGTCAGATGCTCAAGG        |                     |                                        |                 |
| Cagl.fwd                                             | GGCTCTGACTGACCGCGTTAC         | 176                 |                                        |                 |
| Cagl.rev                                             | GCTGAACTTGTGGCCGTTTACG        |                     |                                        |                 |
| lfit.fwd                                             | AGAGAGTCAAGGCAGTTTCTGAG       | 190                 |                                        |                 |
| lfit.fwd                                             | TCTCACTTCCAAATCAGGTATGTCA     |                     |                                        |                 |
| Pkr.fwd                                              | TCCTCAGAGAACGTGTTTACGAAC      | 169                 |                                        |                 |
| Pkr.rev                                              | TGAAAACCTTGACCAAATCCACCTA     |                     |                                        |                 |
| Oas1.fwd                                             | AGACGTTGTGGAGTGAAGTTTGAG      | 335                 |                                        |                 |
| Oas1.rev                                             | CCCAGCTTCTCCTTACACAGTTG       |                     |                                        |                 |
| Rig1.fwd                                             | AGCTTACTCGGAGGTTTGAAGAAA      | 234                 |                                        |                 |
| Rig1.fwd                                             | CAGTCAGTATGCCAGGCTTTAGAA      |                     |                                        |                 |
| Hprt.fwd                                             | GCTACTGTAATGATCAGTCAACGG      | 213                 | qPCR - standard                        |                 |
| Hprt.rev                                             | CTGTATCCAACACTTCGAGAGGTC      |                     |                                        |                 |
| globin.fwd                                           | GCAGCCACGGTGGCGAGTAT          | 257                 |                                        |                 |
| globin.rev                                           | GTGGGAVAGGAGVTTGAAAT          |                     |                                        |                 |
| <b>qPCR human</b>                                    |                               |                     |                                        |                 |
| IRF1.fwd                                             | CTCTGAAGCTACAACAGATGAGGA      | 169                 | qPCR                                   |                 |
| IRF1.rev                                             | CCTCCTTACAGCTAAAGTCTCCAT      |                     |                                        |                 |
| NMI.fwd                                              | CCTTTGAAAAAGAAGAAGTTGCTC      | 130                 |                                        |                 |
| NMI.rev                                              | ATAAACCTGGAATCTGACTCCTGAA     |                     |                                        |                 |
| GCH1.fwd                                             | ATCTCAGATGTCCTAAACGATGCT      | 185                 |                                        |                 |
| GCH1.fev                                             | GATTTCTACAATCCTCGCAAGTTT      |                     |                                        |                 |
| C1S.fwd                                              | TACTATGTTGCCACAGACATAAATG     | 148                 |                                        |                 |
| C1S.rev                                              | CAATTAACCTCCGCAATTCTTCAT      |                     |                                        |                 |
| IFIT1.fwd                                            | CTAAGCAAACCCCTGCAGAACG        | 179                 |                                        |                 |
| IFIT1.rev                                            | GGAATTCAATCTGATCCAAGACTC      |                     |                                        |                 |
| PKR.fwd                                              | GTGACCAGCACACTCGCTTCTG        | 217                 |                                        |                 |
| PKR.rev                                              | CCATGCCAAACCTCTTGTCACAG       |                     |                                        |                 |
| RIG-I.fwd                                            | CATGTCCACCTTCAGAAGTGTCTG      | 137                 |                                        |                 |
| RIG-I.rev                                            | GGTTTTTCCACAACCTGTAGGAGC      |                     |                                        |                 |
| HPRT.fwd                                             | TGACCTTGATTTATTTTGCATACC      | 102                 |                                        | qPCR - standard |
| HPRT.rev                                             | CGAGCAAGACGTTTCAGTCCCT        |                     |                                        |                 |
